# Supplementary material for: Construction of a prognostic model for lung adenocarcinoma tumor endothelial cells and prediction of immunotherapy based on single-cell transcriptome and Bulk transcriptome
Source: Research Square preprint supplement (doi:10.21203/rs.3.rs-3910408/v1), 2024-02-02
Supplement: Supplementary file 1 [file aff6e26385ab750e14d48470.xlsx]

## Sheet: Table S1
Primers used in this study
gene	primer-F (5'-3')	primer-R (5'-3')
CCDC85B	CTC TGC TGC TTC CTG GAC TC	AGC TCC TTA AGC GCT AGG TT
DPYSL2	GAT CCC CGG AGG AAT TGA CG	GGC TCA GGA ACA ACG TGG TC
LPAR6	TTG TAT GGG TGC ATG TTC AGC	GCC AAT TCC GTG TTG TGA AGT
SH3BP5	GAG CGA GCT GGT GCA TAA GG	TGG ACT TGT TGA TGG CTC TCT
