# Supplementary material for: Construction of a prognostic model for lung adenocarcinoma tumor endothelial cells and prediction of immunotherapy based on single-cell transcriptome and Bulk transcriptome
Source: Research Square preprint supplement (doi:10.21203/rs.3.rs-3910408/v1), 2024-02-02
Supplement: Supplementary file 2 [file c445434fae8ebb6850465572.xlsx]

## Sheet: TCGA-LUAD cohort
ID	FUTIME	FUSTAT	T	ID	futime	fustat	Gender	Age	Stage	T	N	M
				TCGA-44-8120-01A	260	0	male	58	Stage I	T2	N0	M0
				TCGA-99-8025-01A	1060	0	female	72	Stage III	T3	N2	M0
				TCGA-50-6594-01A	370	1	female	79	Stage III	T3	N2	M0
				TCGA-78-7161-01A	291	1	female	69	Stage II	T3	N0	M0
				TCGA-55-7903-01A	567	0	male	64	Stage I	T1	N0	MX
				TCGA-38-4632-01A	1357	1	male	42	Stage IV	T2	N1	M1
				TCGA-64-1677-01A	628	1	female	77	Stage III	T2	N2	M0
				TCGA-86-A456-01A	896	0	female	78	Stage I	T1	N0	M0
				TCGA-44-A47A-01A	466	0	female	78	Stage I	T2	N0	MX
				TCGA-91-6828-01A	323	0	male	70	Stage I	T1	N0	M0
				TCGA-MP-A4TA-01A	950	1	female	75	Stage I	T1	N0	M0
				TCGA-55-7726-01A	652	0	female	72	Stage I	T1	N0	MX
				TCGA-86-8359-01A	444	1	male	52	Stage III	T3	N2	M0
				TCGA-55-5899-01A	930	0	male	58	NA	T1	N1	M0
				TCGA-62-8397-01A	1289	0	female	70	Stage II	T3	N0	M0
				TCGA-99-8032-01A	44	0	male	61	Stage I	T1	N0	M0
				TCGA-MP-A4TC-01A	74	1	male	77	Stage III	T1	N2	M0
				TCGA-95-A4VP-01A	605	0	female	66	Stage III	T2	N2	M0
				TCGA-50-6673-01A	22	1	female	84	Stage I	T1	N0	M0
				TCGA-86-7701-01A	947	0	male	66	Stage IV	T2	N0	M1
				TCGA-L9-A50W-01A	442	1	male	75	Stage II	T1	N1	MX
				TCGA-95-7948-01A	476	0	female	42	Stage I	T2	N0	M0
				TCGA-78-7158-01A	179	1	female	59	Stage III	T4	N2	M0
				TCGA-49-4507-01A	268	1	female	73	Stage III	T3	N1	M0
				TCGA-05-4398-01A	1431	0	female	47	Stage III	T4	N3	M0
				TCGA-86-7953-01A	997	0	female	69	Stage I	T1	N0	M0
				TCGA-86-A4D0-01A	116	1	male	48	Stage II	T2	N0	M0
				TCGA-NJ-A4YQ-01A	1432	0	female	69	Stage I	T1	N0	M0
				TCGA-75-7027-01A	3059	0	male	NA	Stage I	T2	N0	M0
				TCGA-53-7624-01A	1043	1	female	40	Stage IV	T2	N0	M1
				TCGA-L9-A7SV-01A	565	0	male	69	Stage II	T2	N1	M0
				TCGA-50-8460-01A	829	0	male	74	Stage I	T1	N0	M0
				TCGA-L9-A444-01A	307	0	female	60	Stage I	T1	N0	MX
				TCGA-05-4249-01A	1523	0	male	67	Stage I	T2	N0	M0
				TCGA-55-6979-01A	237	1	female	59	Stage II	T2	N1	M0
				TCGA-75-7025-01A	3305	0	male	NA	Stage I	T2	N0	M0
				TCGA-62-8395-01A	1216	0	female	80	Stage II	T3	N0	M0
				TCGA-05-4425-01A	669	0	female	70	Stage IV	T2	N0	M1
				TCGA-62-8394-01A	139	1	female	65	Stage III	T4	N2	M0
				TCGA-49-6767-01A	677	0	female	46	Stage II	T3	N0	MX
				TCGA-55-8204-01A	515	0	female	87	Stage I	T2	N0	MX
				TCGA-MN-A4N1-01A	827	0	male	60	Stage II	T2	N1	M0
				TCGA-35-4123-01A	182	0	male	38	Stage I	T1	N0	M0
				TCGA-55-1594-01A	1178	0	male	68	Stage III	T2	N2	M0
				TCGA-MP-A4SV-01A	2620	1	male	67	Stage I	T2	N0	M0
				TCGA-75-6214-01A	1115	1	female	NA	Stage III	T2	N2	M0
				TCGA-44-6777-01A	987	1	female	85	Stage I	T2	NX	MX
				TCGA-73-4662-01A	2515	0	female	65	Stage I	T1	N0	M0
				TCGA-78-7149-01A	3940	0	male	71	Stage III	T4	N0	M0
				TCGA-05-4426-01A	791	0	male	71	Stage I	T2	N0	M0
				TCGA-44-6775-01A	705	0	female	72	Stage I	T2	N0	MX
				TCGA-86-6851-01A	179	0	female	73	Stage II	T1	N1	M0
				TCGA-O1-A52J-01A	1798	1	female	74	Stage I	T1	N0	MX
				TCGA-78-7540-01A	1197	1	female	66	Stage I	T2	N0	M0
				TCGA-86-8056-01A	139	0	female	63	Stage III	T4	N0	M0
				TCGA-05-4422-01A	365	0	male	68	Stage I	T2	N0	M0
				TCGA-55-6978-01A	176	1	male	81	Stage II	T2	N0	MX
				TCGA-55-7816-01A	468	1	female	49	Stage IV	TX	NX	MX
				TCGA-49-AARO-01A	3759	0	female	39	Stage I	T1	N0	MX
				TCGA-55-6983-01A	2823	0	male	81	Stage II	T2	N1	M0
				TCGA-86-7714-01A	625	1	female	61	Stage III	T1	N2	M0
				TCGA-86-8074-01A	24	0	female	62	Stage II	T1	N1	M0
				TCGA-78-7143-01A	4961	1	female	62	Stage I	T2	N0	M0
				TCGA-55-8620-01A	375	1	male	60	Stage IV	T1	N1	M1
				TCGA-55-8092-01A	154	1	male	75	Stage II	T3	N0	MX
				TCGA-50-5068-01A	1499	1	female	59	Stage II	T2	N1	MX
				TCGA-78-7159-01A	1974	0	female	60	Stage I	T1	NX	M0
				TCGA-MP-A4T6-01A	1790	1	female	76	Stage III	T1	N2	MX
				TCGA-55-8085-01A	904	0	male	64	Stage I	T1	N0	M0
				TCGA-55-7227-01A	952	1	male	77	Stage III	T3	N1	MX
				TCGA-97-A4M5-01A	634	0	male	83	Stage I	T1	N0	M0
				TCGA-49-4486-01A	2318	1	male	72	Stage I	T1	N0	M0
				TCGA-55-8514-01A	520	0	female	70	Stage I	T2	N0	MX
				TCGA-55-8094-01A	541	0	male	51	Stage IV	T2	N0	M1
				TCGA-44-4112-01A	808	1	female	60	Stage I	T2	N0	M0
				TCGA-44-3918-01A	1036	0	female	60	Stage I	T1	N0	M0
				TCGA-49-4490-01A	385	1	female	45	Stage III	T3	N2	M0
				TCGA-95-8494-01A	84	0	male	67	Stage II	T2	N1	M0
				TCGA-MP-A4T9-01A	1265	1	female	54	Stage III	T2	N2	MX
				TCGA-69-7760-01A	202	0	male	73	Stage II	T3	N0	M0
				TCGA-55-7573-01A	487	0	female	72	Stage I	T1	N0	MX
				TCGA-44-6147-01A	845	0	female	67	Stage I	T1	NX	M0
				TCGA-MP-A4SY-01A	1501	1	male	61	Stage II	T2	N1	M0
				TCGA-MP-A4TJ-01A	339	1	female	62	Stage I	T1	N0	M0
				TCGA-55-6970-01A	464	1	female	67	Stage III	T2	N2	MX
				TCGA-49-AARQ-01A	6732	0	female	41	Stage I	T2	N0	MX
				TCGA-44-A47B-01A	287	0	male	79	Stage I	T2	N0	M0
				TCGA-05-4384-01A	426	0	male	66	Stage III	T2	N2	M0
				TCGA-44-7660-01A	592	0	male	72	Stage I	T2	N0	MX
				TCGA-99-7458-01A	747	0	female	74	Stage III	T4	N0	M0
				TCGA-50-5045-01A	2174	1	female	57	NA	T2	N1	M0
				TCGA-69-7979-01A	408	0	female	71	Stage I	T2	N0	MX
				TCGA-49-AARR-01A	4992	0	male	68	Stage I	T1	N0	MX
				TCGA-L9-A743-01A	664	0	male	56	Stage II	T2	N1	M0
				TCGA-55-7725-01A	442	0	female	68	Stage I	T1	N0	MX
				TCGA-86-7711-01A	1046	1	male	70	Stage II	T2	N1	M0
				TCGA-49-6743-01A	1621	0	female	81	Stage III	T1	N2	MX
				TCGA-44-7662-01A	218	0	male	61	Stage I	T2	N0	MX
				TCGA-69-8255-01A	129	0	male	71	Stage I	T1	N0	M0
				TCGA-62-A46Y-01A	414	1	female	70	Stage III	T2	N2	M0
				TCGA-35-5375-01A	264	0	male	61	Stage III	T2	N2	M0
				TCGA-97-A4M3-01A	540	0	female	69	Stage I	T1	N0	M0
				TCGA-NJ-A4YF-01A	2161	0	female	50	Stage I	T1	N0	M0
				TCGA-91-6830-01A	60	0	female	65	Stage II	T1	N1	MX
				TCGA-49-AAR3-01A	1893	0	male	69	Stage II	T2	N1	MX
				TCGA-78-7163-01A	7248	0	male	60	Stage I	T2	N0	M0
				TCGA-05-5429-01A	275	1	male	60	Stage III	T3	N2	M0
				TCGA-78-7145-01A	826	1	female	52	Stage IV	T4	N1	M1
				TCGA-86-A4P8-01A	805	0	female	59	Stage III	T1	N2	MX
				TCGA-55-7994-01A	603	0	male	81	Stage II	T3	N0	MX
				TCGA-69-A59K-01A	591	0	female	60	Stage II	T3	N0	M0
				TCGA-49-AAR4-01A	879	1	male	51	Stage III	T2	N2	MX
				TCGA-91-8499-01A	36	0	female	76	Stage I	T1	N0	MX
				TCGA-91-8497-01A	434	1	female	75	Stage I	T1	N0	MX
				TCGA-44-6778-01A	1864	0	male	59	Stage I	T1	N0	MX
				TCGA-67-3772-01A	573	0	female	82	Stage I	T2	N0	M0
				TCGA-55-8090-01A	598	1	male	80	Stage I	T1	N0	M0
				TCGA-78-7537-01A	1622	1	male	72	Stage I	T2	N0	M0
				TCGA-91-8496-01A	505	0	female	63	Stage I	T2	NX	MX
				TCGA-55-7281-01A	872	0	female	70	Stage I	T1	N0	M0
				TCGA-05-4424-01A	913	0	male	70	Stage II	T3	N0	M0
				TCGA-05-4397-01A	731	1	male	65	Stage II	T2	N1	M0
				TCGA-55-7914-01A	187	1	female	71	Stage II	T1	N1	MX
				TCGA-50-5942-01A	1847	0	female	67	Stage I	T1	N0	M0
				TCGA-55-8208-01A	674	0	female	73	Stage I	T1	N0	M0
				TCGA-93-A4JQ-01A	526	0	male	49	Stage I	T1	N0	MX
				TCGA-50-6597-01A	1268	1	female	79	Stage I	T2	N0	M0
				TCGA-50-6590-01A	1288	1	female	72	Stage I	T2	N0	M0
				TCGA-62-A46P-01A	594	1	male	65	Stage I	T2	N0	M0
				TCGA-97-8179-01A	435	0	male	72	Stage I	T1	N0	M0
				TCGA-55-8615-01A	446	0	male	67	Stage III	T3	N2	MX
				TCGA-71-6725-01A	256	0	female	48	Stage I	T2	N0	M0
				TCGA-73-4666-01A	800	0	female	52	Stage IV	T1	N0	M1
				TCGA-49-6761-01A	354	0	female	68	Stage III	T1	N2	MX
				TCGA-62-8399-01A	2696	0	male	62	Stage III	T2	N2	M0
				TCGA-78-8648-01A	1209	1	female	58	Stage II	T3	N0	M0
				TCGA-97-7547-01A	1965	0	female	67	Stage I	T2	N0	MX
				TCGA-44-6145-01A	595	0	female	62	Stage I	T1	N0	M0
				TCGA-80-5608-01A	2832	0	female	NA	Stage I	T1	N0	M0
				TCGA-78-7535-01A	949	1	male	45	Stage I	T2	N0	M0
				TCGA-86-8358-01A	653	0	male	44	Stage I	T2	N0	M0
				TCGA-44-3919-01A	1026	1	female	71	Stage I	T1	N0	M0
				TCGA-86-7955-01A	1072	0	male	62	Stage I	T2	N0	M0
				TCGA-67-6217-01A	422	0	female	73	Stage II	T2	N1	M0
				TCGA-78-8662-01A	3361	1	female	53	Stage I	T2	N0	M0
				TCGA-97-8176-01A	468	1	male	63	Stage III	T3	N1	M0
				TCGA-78-8640-01A	7062	0	male	59	Stage II	T1	N1	M0
				TCGA-49-6744-01A	1683	0	female	64	Stage II	T2	N1	MX
				TCGA-55-8512-01A	607	1	male	41	Stage IV	T1	N1	M1
				TCGA-49-6742-01A	488	1	male	70	Stage II	T2	N1	M0
				TCGA-50-5935-01A	653	1	female	86	Stage I	T1	N0	M0
				TCGA-38-4629-01A	864	1	male	68	Stage II	T3	N0	M0
				TCGA-55-8089-01A	702	1	male	56	Stage I	T1	N0	M0
				TCGA-MP-A4SW-01A	1778	1	male	53	Stage II	T2	N1	M0
				TCGA-78-7162-01A	3169	1	male	75	Stage I	T1	N0	M0
				TCGA-55-A48Z-01A	651	0	female	60	Stage III	T1	N3	MX
				TCGA-50-5931-01A	434	1	female	75	Stage I	T2	N0	M0
				TCGA-55-7911-01A	537	0	female	70	Stage I	T1	N0	MX
				TCGA-73-4676-01A	281	1	male	45	Stage II	T2	N1	M0
				TCGA-55-1596-01A	2065	0	male	55	Stage II	T2	N1	M0
				TCGA-44-8119-01A	285	0	male	73	Stage II	T3	N0	M0
				TCGA-69-7764-01A	414	0	male	75	Stage I	T1	N0	M0
				TCGA-97-7546-01A	1285	0	female	76	Stage I	T1	N0	MX
				TCGA-38-A44F-01A	133	0	male	80	Stage I	T2	N0	M0
				TCGA-L4-A4E6-01A	435	0	male	67	Stage I	T1	N0	M0
				TCGA-73-A9RS-01A	340	1	male	41	Stage II	T3	N0	M0
				TCGA-44-5643-01A	1013	0	male	53	Stage III	T2	N2	M0
				TCGA-55-A4DF-01A	614	1	male	88	Stage I	T1	N0	MX
				TCGA-50-5930-01A	282	1	male	47	Stage III	T2	N2	M0
				TCGA-97-7553-01A	1870	0	female	58	Stage I	T1	N0	MX
				TCGA-55-6980-01A	2109	0	male	56	Stage I	T1	N0	M0
				TCGA-MP-A4TD-01A	307	1	male	71	Stage III	T2	N2	M0
				TCGA-95-7567-01A	568	0	male	61	Stage II	T2	N1	M0
				TCGA-95-A4VN-01A	553	0	female	62	Stage II	T2	N1	M0
				TCGA-44-3396-01A	1130	0	female	74	Stage III	T2	N2	M0
				TCGA-05-5428-01A	670	0	male	57	Stage II	T1	N1	M0
				TCGA-05-4430-01A	761	0	female	59	Stage I	T2	N0	M0
				TCGA-44-2656-01A	1429	0	male	59	Stage I	T2	N0	M0
				TCGA-S2-AA1A-01A	513	0	female	68	Stage I	T1	N0	M0
				TCGA-55-6642-01A	2449	0	male	63	Stage I	T2	N0	MX
				TCGA-69-7974-01A	184	0	female	54	Stage III	T2	N2	MX
				TCGA-55-A4DG-01A	608	0	male	71	Stage I	T1	N0	MX
				TCGA-50-5939-01A	460	1	male	85	Stage I	T2	N0	M0
				TCGA-55-A48Y-01A	630	0	male	69	Stage II	T2	N0	M0
				TCGA-MN-A4N5-01A	84	0	male	63	Stage I	T1	N0	M0
				TCGA-64-1680-01A	1126	0	male	63	Stage IV	T2	N2	M1
				TCGA-95-7562-01A	87	1	male	71	Stage II	T2	N1	M0
				TCGA-69-7763-01A	690	0	male	69	Stage I	T1	N0	M0
				TCGA-55-8511-01A	552	0	female	73	Stage I	T2	N0	MX
				TCGA-50-5944-01A	1750	0	female	69	Stage I	T1	N0	M0
				TCGA-44-5644-01A	863	0	female	51	Stage I	T2	N0	NA
				TCGA-50-5072-01A	250	1	male	74	Stage III	T2	N2	M0
				TCGA-75-5146-01A	2368	0	male	NA	Stage I	T2	N0	M0
				TCGA-38-4626-01A	3674	0	female	57	NA	T2	N0	M0
				TCGA-83-5908-01A	824	0	female	59	Stage I	T1	N0	M0
				TCGA-75-6212-01A	1516	1	female	NA	Stage II	T2	N1	M0
				TCGA-44-6774-01A	658	0	female	56	Stage III	T1	N2	M0
				TCGA-55-7724-01A	705	0	female	76	Stage I	T2	N0	MX
				TCGA-NJ-A4YI-01A	4	1	female	87	Stage III	T2	N2	M0
				TCGA-55-8299-01A	469	1	female	61	Stage I	T1	N0	MX
				TCGA-J2-8192-01A	739	0	female	65	Stage II	T2	N1	MX
				TCGA-55-8506-01A	11	0	female	62	Stage II	T3	N0	MX
				TCGA-86-8585-01A	353	0	male	57	Stage I	T2	N0	M0
				TCGA-44-7672-01A	719	0	female	52	Stage I	T1	N0	M0
				TCGA-64-5781-01A	1559	0	female	55	Stage I	T2	N0	M0
				TCGA-NJ-A4YP-01A	50	0	male	52	Stage I	T2	N0	M0
				TCGA-73-4677-01A	38	1	male	74	NA	T2	N0	M0
				TCGA-62-8402-01A	1498	1	female	73	Stage III	T2	N2	M0
				TCGA-35-4122-01A	225	0	male	69	Stage I	T1	N0	M0
				TCGA-69-8253-01A	426	0	female	59	Stage II	T1	N1	MX
				TCGA-50-5066-01A	1442	0	male	72	Stage I	T2	N0	M0
				TCGA-49-4501-01A	1421	1	female	67	Stage I	T2	N0	M0
				TCGA-86-7954-01A	605	0	female	68	Stage I	T2	N0	M0
				TCGA-44-2655-01A	1324	0	female	65	Stage I	T1	N0	M0
				TCGA-50-6592-01A	777	1	female	71	Stage I	T2	N0	M0
				TCGA-91-6836-01A	417	0	female	52	Stage I	T2	N0	MX
				TCGA-44-6146-01A	728	0	male	64	Stage II	T3	N0	M0
				TCGA-55-8096-01A	719	1	female	67	Stage I	T2	N0	MX
				TCGA-97-A4M2-01A	624	0	male	66	Stage I	T1	N0	M0
				TCGA-71-8520-01A	210	1	female	60	Stage I	T2	N0	M0
				TCGA-67-3773-01A	427	0	female	84	Stage I	T2	N0	M0
				TCGA-55-A492-01A	596	0	female	70	Stage I	T1	N0	MX
				TCGA-91-6848-01A	224	0	male	59	Stage III	T2	N2	MX
				TCGA-62-8398-01A	444	1	male	55	Stage III	T2	N2	M0
				TCGA-49-AAR0-01A	4765	0	male	57	Stage I	T1	N0	MX
				TCGA-93-A4JP-01A	578	0	male	64	Stage IV	TX	NX	M1
				TCGA-78-7633-01A	1528	1	male	67	Stage I	T2	N0	M0
				TCGA-93-A4JO-01A	33	1	male	70	Stage I	T1	N0	MX
				TCGA-55-7576-01A	670	0	male	54	Stage I	T2	N0	M0
				TCGA-97-7552-01A	1932	0	male	70	Stage I	T2	N0	MX
				TCGA-91-6829-01A	1258	1	male	78	Stage I	T2	N0	MX
				TCGA-73-4670-01A	131	0	female	69	Stage IV	T2	N0	M1
				TCGA-64-5779-01A	864	0	male	61	Stage III	T2	N2	M0
				TCGA-75-5125-01A	2027	1	male	NA	Stage II	T2	N1	M0
				TCGA-38-4631-01A	354	1	female	72	Stage I	T2	N0	M0
				TCGA-L9-A5IP-01A	58	1	female	40	Stage IV	T3	N2	M1
				TCGA-J2-8194-01A	724	0	female	69	Stage II	T3	N0	MX
				TCGA-97-8177-01A	499	0	female	59	Stage I	T2	N0	M0
				TCGA-J2-A4AD-01A	550	1	female	61	Stage I	T1	N0	MX
				TCGA-38-4625-01A	2973	0	female	66	Stage I	T2	N0	M0
				TCGA-67-3774-01A	385	0	female	73	Stage I	T2	N0	M0
				TCGA-NJ-A7XG-01A	617	0	male	49	Stage III	T4	N1	M0
				TCGA-55-6986-01A	3261	0	female	74	Stage I	T2	N0	M0
				TCGA-55-A57B-01A	546	0	female	80	Stage I	T1	N0	M0
				TCGA-L9-A443-01A	193	1	female	63	Stage I	T1	N0	MX
				TCGA-50-6595-01A	189	1	female	74	Stage III	T2	N2	M0
				TCGA-44-8117-01A	385	0	female	54	Stage I	T2	N0	M0
				TCGA-55-6968-01A	1293	1	male	61	Stage IV	T1	N0	M1
				TCGA-44-A479-01A	486	0	female	73	Stage I	T2	N0	MX
				TCGA-69-7761-01A	186	0	male	84	Stage I	T2	N0	MX
				TCGA-MP-A4TF-01A	336	1	female	58	Stage II	T2	N0	M0
				TCGA-78-8660-01A	321	1	male	69	Stage II	T2	N1	M0
				TCGA-05-4427-01A	791	0	female	65	Stage II	T2	N1	M0
				TCGA-NJ-A55O-01A	13	0	female	56	Stage II	T1	N1	M0
				TCGA-86-8075-01A	694	1	female	66	Stage I	T2	N0	M0
				TCGA-62-A46U-01A	2067	0	female	71	Stage II	T2	N1	M0
				TCGA-05-5420-01A	457	0	male	67	Stage III	T2	N2	M0
				TCGA-97-8174-01A	164	1	male	67	Stage II	T2	N0	M0
				TCGA-49-AARN-01A	1135	1	female	56	Stage I	T1	N0	MX
				TCGA-91-6849-01A	35	0	female	75	Stage III	T2	N2	MX
				TCGA-86-8669-01A	938	0	male	64	Stage I	T1	N0	M0
				TCGA-50-7109-01A	308	1	male	60	Stage I	T1	N0	M0
				TCGA-44-3917-01A	1183	0	female	33	Stage I	T2	N0	M0
				TCGA-55-8510-01A	539	0	female	55	Stage I	T2	N0	MX
				TCGA-49-AAQV-01A	677	1	female	63	Stage II	T1	N1	MX
				TCGA-55-7574-01A	995	1	female	64	Stage I	T2	N0	M0
				TCGA-50-8459-01A	1119	0	male	68	Stage II	T3	N0	M0
				TCGA-93-A4JN-01A	718	0	male	71	Stage IV	T2	N0	M1
				TCGA-49-4512-01A	905	1	female	69	Stage III	T2	N2	MX
				TCGA-55-8097-01A	476	0	female	60	Stage I	T1	N0	MX
				TCGA-55-7727-01A	119	0	male	70	Stage III	T1	N2	MX
				TCGA-55-8508-01A	617	0	female	60	Stage II	T2	N1	MX
				TCGA-69-7765-01A	165	0	male	56	NA	T4	N0	MX
				TCGA-44-7659-01A	691	0	male	70	Stage I	T1	N0	MX
				TCGA-78-7160-01A	697	1	male	61	Stage IV	T4	N2	M1
				TCGA-44-2659-01A	1367	0	female	65	Stage II	T1	N1	M0
				TCGA-93-8067-01A	186	0	male	77	Stage I	T2	N0	MX
				TCGA-44-A4SU-01A	409	1	female	67	Stage I	T1	N0	MX
				TCGA-55-A490-01A	99	1	male	78	Stage II	T2	N0	MX
				TCGA-55-7907-01A	343	1	male	77	Stage II	T2	N1	MX
				TCGA-49-4494-01A	1081	1	male	77	Stage III	T3	N2	M0
				TCGA-75-6206-01A	2590	0	male	NA	Stage I	T2	N0	M0
				TCGA-86-8671-01A	839	0	female	72	Stage II	T2	N1	M0
				TCGA-86-8672-01A	19	1	male	59	Stage II	T3	N0	M0
				TCGA-50-5946-01A	1617	0	male	62	Stage I	T1	N0	MX
				TCGA-64-1681-01A	1167	1	female	61	Stage I	T1	N0	M0
				TCGA-86-7713-01A	1157	0	male	70	Stage II	T2	N0	M0
				TCGA-97-8172-01A	545	0	female	75	Stage I	T2	N0	M0
				TCGA-50-5055-01A	1830	1	female	79	Stage II	T1	N1	M0
				TCGA-67-6216-01A	141	0	female	57	Stage I	T1	N0	M0
				TCGA-55-7283-01A	609	0	female	76	Stage III	T3	N2	MX
				TCGA-95-A4VK-01A	651	0	female	74	Stage III	T2	N2	M0
				TCGA-55-8091-01A	600	0	male	74	Stage I	T2	N0	MX
				TCGA-73-4659-01A	711	1	male	66	Stage III	T2	N2	M0
				TCGA-75-5147-01A	1333	0	female	NA	Stage I	T2	N0	M0
				TCGA-86-8073-01A	740	0	male	58	Stage I	T2	N0	M0
				TCGA-86-8280-01A	701	0	female	54	Stage II	T2	N0	M0
				TCGA-86-6562-01A	376	1	male	52	Stage II	T2	N1	M0
				TCGA-38-4627-01A	1147	1	female	64	Stage II	T1	N1	M0
				TCGA-78-7536-01A	244	1	male	69	Stage III	T2	N2	M0
				TCGA-05-5715-01A	62	0	female	69	Stage I	T2	N0	M0
				TCGA-67-6215-01A	174	0	female	52	Stage I	T2	N0	M0
				TCGA-50-6593-01A	336	1	female	49	Stage III	T1	N2	M0
				TCGA-69-7973-01A	230	0	female	42	Stage I	T2	N0	M0
				TCGA-38-6178-01A	448	0	female	70	Stage III	T2	N2	NA
				TCGA-67-3770-01A	610	0	female	70	Stage I	T1	N0	M0
				TCGA-35-3615-01A	14	0	male	57	Stage I	T2	N0	M0
				TCGA-50-5936-01A	257	1	male	58	Stage III	T2	N2	M0
				TCGA-44-7671-01A	889	0	male	64	Stage I	T2	N0	M0
				TCGA-55-6984-01A	760	1	female	71	Stage II	T2	N1	M0
				TCGA-50-5932-01A	1235	1	male	75	Stage II	T2	N1	M0
				TCGA-44-2657-01A	1351	0	female	74	Stage I	T2	NX	M0
				TCGA-97-8175-01A	551	0	female	55	Stage I	T2	N0	M0
				TCGA-78-7146-01A	173	1	female	71	Stage III	T2	N2	M0
				TCGA-44-A4SS-01A	415	0	male	73	Stage I	T1	N0	M0
				TCGA-05-4405-01A	610	0	female	74	Stage I	T2	N0	M0
				TCGA-44-2665-01A	1301	0	female	55	Stage II	T2	N1	M0
				TCGA-99-8033-01A	656	1	female	74	Stage IV	TX	NX	M1
				TCGA-50-6591-01A	119	1	female	63	Stage IV	T2	N0	M1
				TCGA-05-4402-01A	244	1	female	57	Stage IV	T2	NX	M1
				TCGA-69-8453-01A	813	0	male	77	Stage II	T3	N0	MX
				TCGA-55-8614-01A	536	0	male	76	Stage I	T2	N0	MX
				TCGA-05-4396-01A	303	1	male	76	Stage III	T4	N1	M0
				TCGA-49-6745-01A	522	0	male	82	Stage III	T2	N2	M0
				TCGA-97-7554-01A	775	0	female	83	Stage III	T2	N2	M0
				TCGA-73-4675-01A	922	1	male	59	Stage III	T3	N1	M0
				TCGA-95-7039-01A	1272	0	female	54	Stage II	T3	N0	MX
				TCGA-97-7941-01A	484	0	female	72	Stage I	T1	N0	MX
				TCGA-55-7995-01A	889	0	female	73	Stage I	T1	N0	M0
				TCGA-69-7980-01A	411	0	female	70	Stage I	T1	N0	M0
				TCGA-97-8547-01A	657	0	female	78	Stage III	T2	N2	MX
				TCGA-78-7166-01A	258	1	male	84	Stage II	T2	N1	M0
				TCGA-55-8207-01A	977	0	male	73	Stage I	T2	N0	MX
				TCGA-44-2668-01A	761	1	male	51	Stage I	T2	N0	M0
				TCGA-MP-A4TE-01A	896	1	male	56	Stage II	T2	N0	MX
				TCGA-78-7153-01A	3635	0	female	65	Stage I	T2	N0	M0
				TCGA-86-8673-01A	862	0	male	61	Stage I	T2	N0	M0
				TCGA-55-6972-01A	1632	1	male	72	Stage I	T2	N0	M0
				TCGA-44-6779-01A	500	1	female	50	Stage II	T2	N1	MX
				TCGA-05-4403-01A	578	0	male	76	Stage I	T2	N0	M0
				TCGA-53-7626-01A	929	1	female	76	Stage II	T1	N1	M0
				TCGA-78-7154-01A	593	1	male	72	Stage III	T3	N2	M0
				TCGA-62-A46O-01A	1454	1	female	65	Stage I	T2	N0	M0
				TCGA-91-6840-01A	372	0	female	59	Stage I	T1	N0	M0
				TCGA-05-4418-01A	274	1	male	69	Stage III	T3	N2	M0
				TCGA-55-8507-01A	418	0	male	53	Stage I	T1	N0	MX
				TCGA-05-4434-01A	457	1	female	67	Stage IV	T4	N1	M1
				TCGA-44-A47G-01A	351	0	female	73	Stage I	T1	N0	M0
				TCGA-55-7815-01A	773	0	male	76	Stage I	T2	N0	MX
				TCGA-49-4488-01A	869	1	female	74	Stage I	T1	N0	MX
				TCGA-91-6831-01A	310	0	male	66	Stage I	T2	N0	MX
				TCGA-44-5645-01A	852	0	female	61	Stage I	T1	NX	NA
				TCGA-44-2666-01A	97	1	male	43	Stage I	T2	N0	M0
				TCGA-62-A472-01A	910	0	male	70	Stage II	T3	N0	M0
				TCGA-05-4432-01A	761	0	male	66	Stage II	T2	N1	M0
				TCGA-50-5051-01A	478	1	female	42	Stage III	T2	N2	M0
				TCGA-J2-A4AG-01A	988	0	female	66	Stage I	T1	N0	MX
				TCGA-93-7348-01A	531	0	female	75	Stage I	T1	N0	MX
				TCGA-97-A4LX-01A	614	0	male	81	Stage I	T2	N0	M0
				TCGA-78-7542-01A	321	1	male	56	Stage I	T2	N0	M0
				TCGA-55-6543-01A	435	0	female	60	Stage I	T1	N0	MX
				TCGA-97-7938-01A	18	1	female	76	Stage I	T1	N0	MX
				TCGA-86-8668-01A	423	0	female	61	Stage I	T1	N0	M0
				TCGA-69-8254-01A	409	0	male	85	NA	T2	NA	NA
				TCGA-44-2661-01A	1159	0	female	69	Stage I	T1	N0	M0
				TCGA-49-4510-01A	896	1	female	51	Stage II	T2	N1	M0
				TCGA-38-4630-01A	1073	1	female	75	Stage I	T2	N0	M0
				TCGA-MP-A4TK-01A	582	1	female	56	Stage II	T2	N1	MX
				TCGA-64-1676-01A	1728	0	male	58	Stage I	T1	N0	M0
				TCGA-49-AAR2-01A	2224	0	male	64	Stage I	T2	N0	MX
				TCGA-55-7570-01A	824	0	male	60	Stage I	T1	N0	MX
				TCGA-44-3398-01A	1163	0	female	77	Stage I	T1	N0	M0
				TCGA-50-5044-01A	624	1	female	72	Stage III	T4	N1	M0
				TCGA-78-7539-01A	791	0	female	75	Stage II	T2	N0	M0
				TCGA-53-A4EZ-01A	1071	0	male	63	Stage II	T2	N1	MX
				TCGA-91-6847-01A	842	0	female	62	Stage I	T2	N0	MX
				TCGA-78-7156-01A	976	1	male	62	Stage IV	T4	N1	M1
				TCGA-L9-A8F4-01A	476	0	female	64	Stage I	T2	N0	MX
				TCGA-55-8205-01A	599	0	female	76	Stage II	T2	N0	M0
				TCGA-44-7667-01A	1097	0	female	49	Stage II	T3	N0	MX
				TCGA-05-5425-01A	882	0	male	68	Stage II	T2	N1	M0
				TCGA-55-8206-01A	888	0	male	56	Stage I	T1	N0	M0
				TCGA-99-8028-01A	1118	0	female	50	Stage I	T1	N0	M0
				TCGA-78-8655-01A	2360	0	female	77	Stage I	T1	N0	M0
				TCGA-97-8552-01A	626	0	female	55	Stage I	T1	N0	MX
				TCGA-55-6975-01A	118	1	male	61	Stage II	T2	N1	M0
				TCGA-95-7944-01A	377	0	male	71	Stage I	T1	N0	M0
				TCGA-55-1592-01A	701	1	male	65	Stage I	T2	N0	M0
				TCGA-55-7910-01A	1040	0	female	50	Stage II	T2	N0	M0
				TCGA-NJ-A55A-01A	15	0	female	76	Stage I	T2	N0	M0
				TCGA-73-7498-01A	1189	0	female	58	Stage I	T1	N0	M0
				TCGA-55-A494-01A	481	0	female	61	Stage I	T2	N0	MX
				TCGA-78-7152-01A	1215	1	male	65	Stage I	T2	N0	M0
				TCGA-49-4506-01A	999	1	female	68	Stage II	T2	N1	M0
				TCGA-62-A46R-01A	1725	1	female	54	Stage I	T2	N0	M0
				TCGA-97-A4M7-01A	629	0	male	74	Stage I	T1	N0	M0
				TCGA-97-A4M1-01A	601	0	female	52	Stage I	T1	N0	M0
				TCGA-64-5775-01A	62	1	male	71	Stage III	T4	N0	M0
				TCGA-91-7771-01A	492	0	male	62	Stage II	T3	N0	MX
				TCGA-95-7043-01A	503	1	female	63	Stage I	T1	N0	MX
				TCGA-44-2662-01A	1280	0	male	65	Stage I	T2	N0	M0
				TCGA-44-7661-01A	557	1	female	69	Stage I	T2	N0	M0
				TCGA-MN-A4N4-01A	1175	0	male	57	Stage I	T1	N0	M0
				TCGA-38-4628-01A	1492	1	female	65	Stage II	T2	N1	M0
				TCGA-99-AA5R-01A	658	0	female	70	Stage I	T1	N0	M0
				TCGA-05-4415-01A	91	1	male	57	Stage III	T4	N2	M0
				TCGA-49-AARE-01A	1229	1	female	51	Stage I	T1	N0	MX
				TCGA-55-A493-01A	28	0	female	54	Stage I	T2	N0	M0
				TCGA-62-A46S-01A	1653	1	male	73	Stage I	T2	N0	M0
				TCGA-86-A4JF-01A	737	1	male	56	Stage II	T3	N0	M0
				TCGA-55-6985-01A	1233	0	female	58	Stage I	T2	N0	MX
				TCGA-J2-A4AE-01A	1079	0	female	77	Stage I	T1	N0	MX
				TCGA-78-7147-01A	586	1	female	67	Stage II	T2	N1	M0
				TCGA-93-7347-01A	683	0	female	76	Stage I	T1	N0	MX
				TCGA-91-A4BC-01A	44	0	male	59	Stage II	T2	N0	MX
				TCGA-MP-A4TI-01A	429	1	male	72	Stage II	T2	N1	M0
				TCGA-55-6712-01A	171	1	male	71	Stage II	T2	N1	MX
				TCGA-50-5941-01A	1474	0	female	55	Stage III	T2	N2	M0
				TCGA-64-1678-01A	1189	0	female	70	NA	T2	N0	M0
				TCGA-4B-A93V-01A	300	1	female	52	Stage I	T1	N0	M0
				TCGA-55-8616-01A	48	0	female	58	Stage I	T2	N0	M0
				TCGA-62-A46V-01A	2199	0	female	78	Stage I	T2	N0	M0
				TCGA-69-7978-01A	134	0	male	59	Stage II	T2	N1	MX
				TCGA-55-8505-01A	440	0	male	62	Stage III	T1	N2	MX
				TCGA-05-4250-01A	121	1	female	79	Stage III	T3	N1	M0
				TCGA-NJ-A4YG-01A	2261	0	male	65	Stage I	T2	N0	M0
				TCGA-55-8302-01A	478	0	male	54	Stage I	T2	N0	MX
				TCGA-64-1679-01A	2488	0	female	58	Stage III	T1	N2	M0
				TCGA-38-7271-01A	800	1	female	72	Stage I	T1	N0	M0
				TCGA-55-8619-01A	416	0	female	72	Stage II	T3	N0	MX
				TCGA-86-8076-01A	993	0	male	42	Stage I	T1	N0	M0
				TCGA-73-7499-01A	1531	1	female	81	Stage I	T2	N0	M0
				TCGA-44-6148-01A	704	0	male	60	Stage I	T1	N0	M0
				TCGA-55-8621-01A	515	0	female	75	Stage I	T1	N0	MX
				TCGA-95-8039-01A	830	0	male	72	Stage I	T1	N0	MX
				TCGA-MP-A5C7-01A	2248	0	female	76	Stage I	T2	N0	M0
				TCGA-50-5933-01A	2393	1	male	72	Stage III	T4	N2	M0
				TCGA-MP-A4T8-01A	161	1	male	68	Stage III	T2	N2	M0
				TCGA-55-6971-01A	1400	0	female	59	Stage I	T2	N0	MX
				TCGA-NJ-A55R-01A	603	0	male	67	Stage I	T1	N0	MX
				TCGA-64-5778-01A	1305	0	male	60	Stage I	T2	N0	M0
				TCGA-MP-A4TH-01A	741	0	female	70	Stage I	T1	N0	M0
				TCGA-50-5049-01A	3094	0	male	70	Stage I	T2	N0	M0
				TCGA-55-8203-01A	547	0	female	69	Stage I	T1	N0	M0
				TCGA-44-7670-01A	882	0	female	47	Stage II	T1	N1	M0
				TCGA-86-A4P7-01A	415	0	female	63	Stage I	T2	N0	M0
				TCGA-05-4417-01A	455	0	female	51	Stage I	T2	N0	M0
				TCGA-55-A491-01A	626	0	female	81	Stage I	T1	N0	MX
				TCGA-64-5815-01A	866	0	male	74	Stage II	T2	N1	M0
				TCGA-05-4389-01A	1369	0	male	70	Stage I	T1	N0	M0
				TCGA-78-7150-01A	666	1	male	59	Stage II	T2	N1	M0
				TCGA-55-8513-01A	791	0	female	77	Stage II	T3	N0	MX
				TCGA-86-8278-01A	944	0	female	63	Stage II	T2	N1	M0
				TCGA-05-4433-01A	730	0	male	82	Stage I	T2	N0	M0
				TCGA-73-4658-01A	1600	1	female	80	Stage I	T2	N0	M0
				TCGA-55-8301-01A	534	0	male	58	Stage I	T2	N0	MX
				TCGA-73-4668-01A	467	0	female	66	Stage II	T2	N1	M0
				TCGA-49-4487-01A	855	1	female	72	Stage I	T1	N0	M0
				TCGA-05-4390-01A	1126	0	female	58	Stage I	T2	N0	M0
				TCGA-44-6776-01A	2616	0	female	60	Stage I	T1	N0	MX
				TCGA-49-4514-01A	1700	0	female	79	Stage I	T1	N0	M0
				TCGA-50-8457-01A	1125	0	female	63	Stage I	T1	N0	M0
				TCGA-55-1595-01A	1479	0	female	74	Stage I	T1	N0	M0
				TCGA-55-6969-01A	1239	0	male	52	Stage I	T2	N0	M0
				TCGA-97-A4M0-01A	652	0	female	60	Stage I	T2	N0	M0
				TCGA-55-7728-01A	704	0	female	64	Stage I	T2	N0	MX
				TCGA-95-7947-01A	477	0	male	67	Stage I	T1	N0	M0
				TCGA-80-5611-01A	2595	0	male	NA	Stage I	T2	N0	M0
				TCGA-62-A470-01A	1194	1	male	84	Stage I	T2	N0	M0
				TCGA-55-8087-01A	462	0	female	59	Stage I	T2	N0	MX
				TCGA-78-7148-01A	626	1	male	71	Stage II	T2	N1	M0
				TCGA-78-7155-01A	1171	1	male	68	Stage I	T2	N0	M0
				TCGA-97-7937-01A	564	0	male	65	Stage I	T2	N0	MX
				TCGA-64-5774-01A	2676	0	male	60	Stage I	T2	N0	M0
				TCGA-78-7220-01A	807	1	female	53	Stage III	T2	N2	M0
				TCGA-78-7167-01A	2681	1	male	77	Stage IV	T2	N0	M1
				TCGA-86-8279-01A	949	0	male	46	Stage II	T2	N1	M0
				TCGA-62-A471-01A	1246	0	male	64	Stage II	T2	N1	M0
				TCGA-97-A4M6-01A	568	0	female	45	Stage I	T1	N0	M0
				TCGA-L4-A4E5-01A	578	0	female	48	Stage I	T1	N0	M0
				TCGA-55-A48X-01A	689	0	female	63	Stage II	T1	N1	M0
				TCGA-86-8055-01A	124	1	male	79	Stage II	T2	N1	M0
				TCGA-55-6982-01A	995	1	female	79	Stage II	T2	N1	M0
				TCGA-05-5423-01A	151	0	male	65	Stage II	T2	N1	M0
				TCGA-05-4382-01A	607	0	male	68	Stage I	T2	N0	M0
				TCGA-55-6987-01A	2137	0	male	77	Stage I	T1	N0	M0
				TCGA-91-6835-01A	79	0	female	81	Stage I	T1	N0	M0
				TCGA-97-8171-01A	568	0	male	81	Stage IV	T2	N2	M1
				TCGA-53-7813-01A	424	0	female	51	Stage III	T4	N0	M0
				TCGA-MP-A4T4-01A	2617	1	female	68	Stage II	T2	N1	M0
				TCGA-05-4420-01A	912	0	male	41	Stage I	T2	N0	M0
				TCGA-MP-A4T7-01A	167	1	female	75	Stage IV	T2	N0	M1
				TCGA-49-AAR9-01A	260	1	male	61	Stage II	T3	N0	MX
				TCGA-44-7669-01A	574	1	male	59	Stage II	T1	N1	MX
				TCGA-86-8674-01A	806	0	male	50	Stage II	T2	N1	M0
				TCGA-55-6981-01A	1379	1	female	53	Stage III	T1	N2	M0
				TCGA-49-4505-01A	428	1	female	61	Stage II	T2	N1	M0
				TCGA-91-A4BD-01A	603	0	male	78	Stage II	T1	N1	MX
				TCGA-67-3771-01A	610	0	female	77	Stage I	T1	N0	M0
				TCGA-86-8054-01A	1148	0	male	61	Stage II	T2	N1	M0

## Sheet: GSE31210 cohort
ID	futime	fustat
GSM773540	437	1
GSM773541	743	0
GSM773542	2601	0
GSM773543	1173	0
GSM773544	2369	0
GSM773545	1879	0
GSM773546	606	0
GSM773547	300	1
GSM773548	1919	0
GSM773549	1835	0
GSM773550	1828	0
GSM773551	1841	1
GSM773552	639	1
GSM773553	1311	1
GSM773554	1098	0
GSM773555	1189	0
GSM773556	3863	0
GSM773557	1475	0
GSM773558	1856	0
GSM773559	3067	0
GSM773560	1142	0
GSM773561	1825	0
GSM773562	1610	0
GSM773563	2014	0
GSM773564	1826	0
GSM773565	2191	0
GSM773566	3342	0
GSM773567	1328	0
GSM773568	2925	0
GSM773569	2880	0
GSM773570	1724	0
GSM773571	2765	0
GSM773572	1529	0
GSM773573	221	1
GSM773574	546	1
GSM773575	346	1
GSM773576	853	1
GSM773577	2661	1
GSM773578	817	0
GSM773579	425	1
GSM773580	1281	0
GSM773581	1044	0
GSM773582	565	0
GSM773583	1059	1
GSM773584	1625	1
GSM773585	1695	1
GSM773586	2976	0
GSM773587	1143	1
GSM773588	1682	0
GSM773589	1242	1
GSM773590	2252	0
GSM773591	943	1
GSM773592	1346	1
GSM773593	1482	1
GSM773594	2386	0
GSM773595	1560	0
GSM773596	1001	1
GSM773597	259	1
GSM773598	2289	0
GSM773599	1916	0
GSM773600	2048	0
GSM773601	1475	0
GSM773602	1539	0
GSM773603	636	0
GSM773604	1275	0
GSM773605	2005	0
GSM773606	1965	0
GSM773607	2425	0
GSM773608	1566	0
GSM773609	990	0
GSM773610	729	0
GSM773611	2354	0
GSM773612	818	0
GSM773613	2009	0
GSM773614	2549	0
GSM773615	3411	0
GSM773616	1806	0
GSM773617	1937	0
GSM773618	1520	0
GSM773619	1375	0
GSM773620	1756	0
GSM773621	1597	0
GSM773622	1714	0
GSM773623	1637	0
GSM773624	1653	0
GSM773625	1196	0
GSM773626	1702	0
GSM773627	2050	0
GSM773628	1256	0
GSM773629	818	0
GSM773630	1154	0
GSM773631	3058	0
GSM773632	1941	0
GSM773633	1596	0
GSM773634	2450	0
GSM773635	1881	0
GSM773636	1637	0
GSM773637	2034	0
GSM773638	2134	0
GSM773639	779	1
GSM773640	540	1
GSM773641	1317	0
GSM773642	1980	0
GSM773643	702	1
GSM773644	564	1
GSM773645	788	1
GSM773646	1463	0
GSM773647	1345	1
GSM773648	832	0
GSM773649	2687	0
GSM773650	1122	1
GSM773651	2668	0
GSM773652	1936	0
GSM773653	871	0
GSM773654	2671	0
GSM773655	1482	0
GSM773656	1128	0
GSM773657	1042	1
GSM773658	1229	1
GSM773659	2263	1
GSM773660	1770	0
GSM773661	1433	1
GSM773662	1823	0
GSM773663	1988	0
GSM773664	1434	0
GSM773665	630	1
GSM773666	1537	0
GSM773667	1429	1
GSM773668	1038	1
GSM773669	2486	0
GSM773670	740	0
GSM773671	1042	0
GSM773672	1267	0
GSM773673	1017	0
GSM773674	1041	0
GSM773675	1859	0
GSM773676	1717	0
GSM773677	1494	0
GSM773678	754	0
GSM773679	2364	0
GSM773680	1733	0
GSM773681	1941	0
GSM773682	774	0
GSM773683	2913	0
GSM773684	1803	0
GSM773685	1912	0
GSM773686	1481	0
GSM773687	1231	0
GSM773688	1964	0
GSM773689	3352	0
GSM773690	2158	0
GSM773691	3466	0
GSM773692	3263	0
GSM773693	1823	0
GSM773694	1856	0
GSM773695	2449	0
GSM773696	1859	0
GSM773697	1998	0
GSM773698	1852	0
GSM773699	1894	0
GSM773700	1861	0
GSM773701	1669	0
GSM773702	3189	0
GSM773703	1822	0
GSM773704	1809	0
GSM773705	2552	0
GSM773706	2968	0
GSM773707	3066	0
GSM773708	1412	0
GSM773709	1317	0
GSM773710	1180	0
GSM773711	1688	0
GSM773712	1417	0
GSM773713	1426	0
GSM773714	1674	0
GSM773715	1848	0
GSM773716	1856	0
GSM773717	1780	0
GSM773718	2084	0
GSM773719	1879	0
GSM773720	1114	0
GSM773721	2806	0
GSM773722	1663	0
GSM773723	1726	0
GSM773724	1629	0
GSM773725	2179	0
GSM773726	1917	0
GSM773727	1446	0
GSM773728	1162	0
GSM773729	1231	0
GSM773730	941	0
GSM773731	1623	0
GSM773732	1855	0
GSM773733	1404	0
GSM773734	2221	0
GSM773735	849	0
GSM773736	831	0
GSM773737	3219	0
GSM773738	2585	0
GSM773739	2442	0
GSM773740	1910	0
GSM773741	1834	0
GSM773742	2918	0
GSM773743	2285	0
GSM773744	2149	0
GSM773745	2561	0
GSM773746	1947	0
GSM773747	1841	0
GSM773748	1971	0
GSM773749	2409	0
GSM773750	1624	0
GSM773751	2430	0
GSM773752	1856	0
GSM773753	1516	0
GSM773754	1819	0
GSM773755	2413	0
GSM773756	1849	0
GSM773757	2181	0
GSM773758	2168	0
GSM773759	2154	0
GSM773760	2073	0
GSM773761	1994	0
GSM773762	2137	0
GSM773763	1998	0
GSM773764	1908	0
GSM773765	1660	0

## Sheet: GSE50081 cohort
ID	futime	fustat
GSM1213670	2744.8	0
GSM1213671	2671.8	0
GSM1213672	2496.6	0
GSM1213673	697.15	1
GSM1213676	1580.45	1
GSM1213677	2270.3	0
GSM1213678	1489.2	1
GSM1213679	2303.15	0
GSM1213680	2186.35	0
GSM1213681	1941.8	0
GSM1213682	2029.4	0
GSM1213683	1832.3	0
GSM1213685	2467.4	0
GSM1213686	1036.6	1
GSM1213687	2357.9	0
GSM1213688	2102.4	0
GSM1213689	1806.75	0
GSM1213690	1868.8	0
GSM1213691	2332.35	0
GSM1213692	2095.1	1
GSM1213693	401.5	1
GSM1213694	2441.85	0
GSM1213695	2131.6	0
GSM1213696	1890.7	0
GSM1213697	2325.05	0
GSM1213698	2054.95	1
GSM1213699	686.2	1
GSM1213700	1470.95	1
GSM1213702	1069.45	1
GSM1213703	2175.4	1
GSM1213704	2022.1	0
GSM1213707	1974.65	0
GSM1213710	120.45	0
GSM1213715	2686.4	0
GSM1213716	1595.05	1
GSM1213717	1792.15	1
GSM1213720	2325.05	0
GSM1213722	456.25	1
GSM1213723	952.65	1
GSM1213724	2292.2	0
GSM1213726	2394.4	0
GSM1213727	2113.35	1
GSM1213728	1967.35	0
GSM1213730	1171.65	1
GSM1213733	1270.2	1
GSM1213734	1883.4	0
GSM1213735	2211.9	0
GSM1213736	332.15	1
GSM1213737	1076.75	0
GSM1213738	1405.25	1
GSM1213739	43.8	0
GSM1213740	2131.6	0
GSM1213741	2317.75	1
GSM1213742	1919.9	1
GSM1213743	1835.95	0
GSM1213746	1887.05	0
GSM1213747	1507.45	0
GSM1213749	1168	1
GSM1213750	375.95	1
GSM1213751	1792.15	0
GSM1213752	354.05	1
GSM1213753	1127.85	1
GSM1213754	737.3	1
GSM1213756	1923.55	0
GSM1213757	2098.75	0
GSM1213758	2011.15	0
GSM1213759	2003.85	0
GSM1213760	1668.05	0
GSM1213761	1799.45	0
GSM1213762	313.9	1
GSM1213763	711.75	1
GSM1213764	2828.75	0
GSM1213768	1584.1	0
GSM1213769	1930.85	0
GSM1213770	770.15	1
GSM1213773	1748.35	1
GSM1213774	1098.65	1
GSM1213775	1146.1	1
GSM1213777	1989.25	0
GSM1213779	1135.15	0
GSM1213780	237.25	1
GSM1213781	657	1
GSM1213782	1171.65	0
GSM1213783	219	1
GSM1213784	1898	0
GSM1213785	1419.85	1
GSM1213787	1251.95	0
GSM1213788	543.85	1
GSM1213792	1065.8	1
GSM1213793	981.85	0
GSM1213794	1821.35	0
GSM1213795	2434.55	0
GSM1213797	2131.6	0
GSM1213798	3971.2	0
GSM1213800	186.15	0
GSM1213801	1474.6	1
GSM1213803	562.1	0
GSM1213804	2857.95	0
GSM1213805	2197.3	0
GSM1213806	624.15	0
GSM1213807	259.15	0
GSM1213808	1825	0
GSM1213809	463.55	0
GSM1213810	54.75	0
GSM1213811	500.05	0
GSM1213812	292	1
GSM1213814	1861.5	0
GSM1213816	32.85	0
GSM1213818	1233.7	0
GSM1213819	554.8	1
GSM1213820	697.15	1
GSM1213824	580.35	1
GSM1213825	2693.7	0
GSM1213826	208.05	1
GSM1213827	1522.05	0
GSM1213831	1872.45	0
GSM1213833	204.4	1
GSM1213834	989.15	0
GSM1213836	459.9	0
GSM1213837	2777.65	1
GSM1213840	448.95	1
GSM1213844	1657.1	0
GSM1213845	438	1
GSM1213846	113.15	1
GSM1213847	3014.9	0
GSM1213848	36.5	1
GSM1213849	1518.4	0

## Sheet: GSE72094 cohort
ID	futime	fustat
GSM1854798	1249	0
GSM1854799	1057	0
GSM1854800	1025	0
GSM1854801	895	0
GSM1854802	922	1
GSM1854803	959	0
GSM1854804	969	0
GSM1854805	833	0
GSM1854806	891	0
GSM1854807	524	1
GSM1854808	1035	0
GSM1854809	43	0
GSM1854810	925	0
GSM1854811	1053	0
GSM1854812	24	0
GSM1854813	825	0
GSM1854814	854	0
GSM1854815	820	0
GSM1854816	412	0
GSM1854817	297	0
GSM1854818	582	0
GSM1854819	28	0
GSM1854820	22	0
GSM1854821	1260	0
GSM1854822	1402	0
GSM1854823	799	0
GSM1854825	1329	0
GSM1854826	1488	0
GSM1854827	579	0
GSM1854828	1186	0
GSM1854829	1151	0
GSM1854830	1323	0
GSM1854831	314	1
GSM1854832	1110	0
GSM1854833	1494	0
GSM1854834	1024	0
GSM1854835	1134	0
GSM1854836	508	1
GSM1854837	46	1
GSM1854838	1231	1
GSM1854839	917	0
GSM1854840	488	1
GSM1854841	730	0
GSM1854842	1079	1
GSM1854843	1127	0
GSM1854844	193	1
GSM1854846	833	0
GSM1854847	708	0
GSM1854848	1240	0
GSM1854849	1465	0
GSM1854850	1685	0
GSM1854851	1949	0
GSM1854852	1569	0
GSM1854853	275	0
GSM1854854	1507	0
GSM1854855	307	1
GSM1854856	905	1
GSM1854857	1388	0
GSM1854859	814	1
GSM1854860	436	1
GSM1854861	73	1
GSM1854862	1596	0
GSM1854863	1488	0
GSM1854864	398	1
GSM1854865	1623	0
GSM1854866	1238	0
GSM1854867	1481	0
GSM1854868	430	1
GSM1854869	771	0
GSM1854870	1109	0
GSM1854871	1120	0
GSM1854872	844	0
GSM1854873	1086	0
GSM1854874	871	1
GSM1854875	1063	0
GSM1854876	907	0
GSM1854877	776	0
GSM1854879	974	0
GSM1854880	852	0
GSM1854881	732	1
GSM1854882	557	0
GSM1854883	1074	1
GSM1854884	328	1
GSM1854885	528	1
GSM1854886	415	1
GSM1854887	406	0
GSM1854888	840	0
GSM1854889	383	1
GSM1854890	1112	0
GSM1854891	442	1
GSM1854892	244	1
GSM1854893	3	1
GSM1854895	313	1
GSM1854896	1045	1
GSM1854897	347	1
GSM1854898	16	0
GSM1854899	131	1
GSM1854900	907	0
GSM1854902	27	0
GSM1854903	558	1
GSM1854904	1061	0
GSM1854906	1146	0
GSM1854907	1070	0
GSM1854908	1141	0
GSM1854909	889	0
GSM1854910	1147	0
GSM1854911	999	1
GSM1854913	676	0
GSM1854915	140	0
GSM1854916	1153	0
GSM1854917	1239	0
GSM1854918	1156	0
GSM1854919	982	0
GSM1854920	950	0
GSM1854921	50	1
GSM1854922	1150	0
GSM1854923	1326	0
GSM1854924	124	0
GSM1854925	268	0
GSM1854926	262	0
GSM1854927	76	1
GSM1854928	1239	0
GSM1854929	683	0
GSM1854930	926	0
GSM1854931	956	0
GSM1854932	802	0
GSM1854933	818	0
GSM1854934	849	0
GSM1854935	512	1
GSM1854936	962	0
GSM1854937	972	0
GSM1854938	79	0
GSM1854940	947	0
GSM1854941	689	0
GSM1854942	527	0
GSM1854944	1166	0
GSM1854945	1984	0
GSM1854947	281	1
GSM1854948	310	1
GSM1854950	874	0
GSM1854951	80	1
GSM1854952	1106	0
GSM1854953	1779	0
GSM1854954	996	0
GSM1854955	758	0
GSM1854956	460	1
GSM1854957	283	1
GSM1854958	921	0
GSM1854960	949	0
GSM1854961	113	1
GSM1854962	808	0
GSM1854963	35	1
GSM1854964	642	0
GSM1854965	680	1
GSM1854966	23	1
GSM1854967	924	0
GSM1854969	356	0
GSM1854970	392	0
GSM1854971	489	0
GSM1854972	919	0
GSM1854973	913	0
GSM1854974	840	0
GSM1854975	911	0
GSM1854977	692	0
GSM1854979	751	0
GSM1854980	749	0
GSM1854981	591	1
GSM1854983	116	1
GSM1854984	20	0
GSM1854985	687	0
GSM1854986	577	0
GSM1854987	937	0
GSM1854988	785	0
GSM1854989	962	0
GSM1854990	830	0
GSM1854992	554	0
GSM1854994	905	0
GSM1854995	496	1
GSM1854996	651	1
GSM1854997	600	1
GSM1854998	852	1
GSM1854999	897	0
GSM1855000	807	0
GSM1855001	487	1
GSM1855003	848	0
GSM1855004	1029	0
GSM1855005	977	0
GSM1855006	988	0
GSM1855007	1130	0
GSM1855008	823	0
GSM1855009	756	0
GSM1855010	681	0
GSM1855011	1012	0
GSM1855012	1079	0
GSM1855014	1119	1
GSM1855015	868	0
GSM1855016	994	0
GSM1855018	878	0
GSM1855019	358	1
GSM1855020	1189	0
GSM1855021	890	0
GSM1855022	831	0
GSM1855023	1174	0
GSM1855024	1006	0
GSM1855026	1038	0
GSM1855027	837	1
GSM1855028	911	0
GSM1855029	780	1
GSM1855031	1033	0
GSM1855032	818	0
GSM1855033	1011	0
GSM1855034	809	0
GSM1855035	1074	0
GSM1855036	932	1
GSM1855037	1057	0
GSM1855038	871	0
GSM1855039	267	1
GSM1855040	807	0
GSM1855041	373	0
GSM1855042	937	0
GSM1855043	1029	0
GSM1855044	987	0
GSM1855045	860	0
GSM1855046	939	0
GSM1855047	1019	0
GSM1855048	652	1
GSM1855049	219	1
GSM1855050	698	0
GSM1855051	622	0
GSM1855052	951	1
GSM1855053	1015	0
GSM1855054	900	0
GSM1855055	1076	0
GSM1855056	1061	0
GSM1855057	76	0
GSM1855059	588	0
GSM1855060	1033	0
GSM1855061	759	1
GSM1855062	600	1
GSM1855063	349	1
GSM1855064	980	0
GSM1855065	724	0
GSM1855066	997	0
GSM1855067	987	0
GSM1855068	1031	1
GSM1855069	305	0
GSM1855070	994	0
GSM1855071	597	0
GSM1855072	679	0
GSM1855073	1042	0
GSM1855074	733	0
GSM1855075	897	0
GSM1855076	917	0
GSM1855077	855	0
GSM1855078	882	0
GSM1855079	336	1
GSM1855080	671	0
GSM1855081	777	0
GSM1855082	595	0
GSM1855083	832	0
GSM1855084	919	0
GSM1855085	971	0
GSM1855086	882	0
GSM1855087	938	0
GSM1855088	468	0
GSM1855089	834	0
GSM1855091	936	1
GSM1855092	732	0
GSM1855093	766	0
GSM1855094	607	0
GSM1855095	578	0
GSM1855096	816	0
GSM1855097	853	0
GSM1855098	759	0
GSM1855099	917	1
GSM1855100	868	0
GSM1855101	920	1
GSM1855102	607	0
GSM1855103	568	0
GSM1855104	98	1
GSM1855105	555	0
GSM1855106	306	1
GSM1855107	906	0
GSM1855108	918	0
GSM1855109	693	1
GSM1855110	680	0
GSM1855111	539	0
GSM1855112	820	0
GSM1855113	750	0
GSM1855114	708	0
GSM1855116	672	0
GSM1855117	470	0
GSM1855118	54	0
GSM1855119	780	0
GSM1855120	216	1
GSM1855121	294	1
GSM1855122	757	0
GSM1855123	760	0
GSM1855124	1089	0
GSM1855125	17	1
GSM1855126	577	0
GSM1855127	539	0
GSM1855128	906	0
GSM1855129	628	0
GSM1855131	696	1
GSM1855132	858	0
GSM1855133	701	0
GSM1855134	382	1
GSM1855135	539	0
GSM1855136	4	1
GSM1855137	557	0
GSM1855138	619	0
GSM1855140	830	0
GSM1855141	821	0
GSM1855142	831	0
GSM1855143	591	0
GSM1855144	850	0
GSM1855145	809	1
GSM1855146	142	0
GSM1855147	807	0
GSM1855149	832	0
GSM1855150	98	1
GSM1855151	798	0
GSM1855152	799	0
GSM1855153	325	1
GSM1855156	978	0
GSM1855157	806	0
GSM1855158	698	0
GSM1855159	861	0
GSM1855160	325	0
GSM1855161	332	1
GSM1855162	734	0
GSM1855163	867	0
GSM1855164	830	0
GSM1855165	541	1
GSM1855166	679	0
GSM1855168	40	1
GSM1855169	740	0
GSM1855170	540	0
GSM1855171	1155	0
GSM1855172	797	0
GSM1855173	676	1
GSM1855174	540	0
GSM1855175	380	1
GSM1855176	1350	0
GSM1855177	570	0
GSM1855178	58	1
GSM1855179	5	0
GSM1855180	554	0
GSM1855181	534	0
GSM1855182	4	0
GSM1855183	1692	0
GSM1855184	223	1
GSM1855185	1085	0
GSM1855187	912	1
GSM1855188	1357	1
GSM1855189	844	1
GSM1855190	520	1
GSM1855192	239	1
GSM1855193	349	0
GSM1855195	1025	1
GSM1855196	1560	1
GSM1855198	564	1
GSM1855199	293	1
GSM1855200	1053	1
GSM1855202	627	1
GSM1855203	395	0
GSM1855204	1007	1
GSM1855206	681	1
GSM1855207	1293	0
GSM1855208	1293	1
GSM1855209	968	1
GSM1855210	1843	0
GSM1855211	1616	0
GSM1855212	1559	0
GSM1855213	1703	0
GSM1855214	1834	0
GSM1855215	1551	0
GSM1855217	1554	0
GSM1855218	489	1
GSM1855219	216	1
GSM1855220	1510	0
GSM1855221	701	0
GSM1855222	1363	0
GSM1855223	1135	1
GSM1855224	618	1
GSM1855225	1037	1
GSM1855226	1599	0
GSM1855228	171	1
GSM1855229	2077	0
GSM1855230	1652	0
GSM1855231	489	1
GSM1855232	762	1
GSM1855234	1693	0
GSM1855235	713	1
GSM1855236	1652	0
GSM1855237	181	1
GSM1855238	1629	1
